# Supplementary material for: C-type lectin 4 regulates broad-spectrum melanization-based refractoriness to malaria parasites
Source: PLoS Biol. 2022 Jan 13;20(1):e3001515. doi: 10.1371/journal.pbio.3001515 (PMC8791531; doi:10.1371/journal.pbio.3001515)
Supplement: S5 File — (XLSX) [file pbio.3001515.s012.xlsx]

## Sheet: Figure 2
Fig 2A						Fig 2B						Fig 2D						Fig 2E			Fig 2F
Control L	Control M	CTL4null L	CTL4null M	CTL4null A		Control L	Control M	CTL4null L	CTL4null M	CTL4null A		Control L	Control M	CTL4null L	CTL4null M	CTL4null A		Control	CTL4null		Control L	Control M	CTL4null L	CTL4null M	CTL4null A
6	0	0	11	11		13	0	0	13	13		2	0	2	6	8		2700	0		32	0	5	1	6
12	0	0	13	13		5	0	0	8	8		0	0	0	0	0		2700	2700		84	0	0	0	0
43	0	0	78	78		98	0	0	99	99		3	0	0	2	2		6000	0		6	0	1	1	2
2	0	0	6	6		53	0	0	72	72		0	0	0	3	3		3900	0		42	0	2	0	2
6	0	0	8	8		81	0	0	53	53		0	0	0	0	0		1800	0		55	0	5	0	5
5	0	0	21	21		5	0	0	21	21		3	0	0	0	0		1200	1200		2	0	2	0	2
24	0	0	6	6		78	0	0	33	33		3	0	0	1	1		1800	0		2	0	10	0	10
4	0	0	2	2		89	0	0	95	95		2	0	0	0	0		1800	0		60	0	0	4	4
0	0	0	21	21		69	0	0	107	108		2	0	0	4	4		4500	0		34	0	0	0	0
0	0	0	4	4		0	0	0	4	4		0	0	0	2	2		1200	0		62	0	6	2	8
0	0	0	12	12		0	0	0	39	39		3	0	0	5	5		6900	1500		26	0	0	1	1
0	0	0	13	13		36	0	0	0	0		5	0	0	0	0		6900	0		16	0	14	1	15
0	0	0	9	9		20	0	0	80	80		0	0	1	4	5		0	0		43	0	9	3	12
28	0	0	3	3		30	0	0	37	37		3	0	0	4	4		900	0		13	0	2	0	2
56	0	0	10	10		63	0	0	47	47		1	0	0	1	1		0	0		1	0	16	2	18
13	0	0	4	4		53	0	0	43	43		2	0	0	3	3		6000	0		39	0	8	1	9
87	0	0	8	8		56	0	0	7	7		5	0	0	0	0		0	0		3	0	0	0	0
1	0	0	2	2		14	0	0	58	58		0	0	0	4	4		0	0		1	0	5	4	9
0	0	0	6	6		2	0	0	42	42		0	0	0	2	2		0	0		57	0	0	0	0
25	0	0	3	3		96	0	0	35	35		0	0	0	1	1		0	1200		9	0	0	14	14
7	0	0	4	4		41	0	0	52	52		0	0	0	0	0		1800	0		13	0	10	2	12
24	0					56	0	0	58	58		0	0	0	6	6		0	1800		34	0	0	7	7
2	0					88	0	0	34	34		7	0	0	2	2		0	0		11	0	0	3	3
0	0					54	0	0	61	61		0	0	0	0	0		1800	2100		8	0	1	1	2
5	0					8	0	0	52	52		1	0	0	0	0		3300	0		30	0	4	5	9
7	0					56	0	0	32	32		6	0	0	19	19		3600	0		3	0	1	6	7
0	0					5	0	0	38	38		0	0	0	0	0		8400	900		17	0	0	4	4
10	0					29	0	0	48	48		10	0	0	10	10		0	600		20	0	0	2	2
8	0					7	0	0	15	15		1	0	0	0	0		0	0		38	0	0	8	8
6	0					44	0	0	44	44		13	0	0	9	9		1200	0		39	0	1	5	6
4	0					15	0	0	86	86		0	0	0	0	0		0	600		64	0	0	2	2
3	0					57	0	0	25	25		0	0	2	5	7		1500	600		7	0	18	3	21
10	0					47	0	0	37	37		0	0	0	2	2		1500	300		4	0	0	48	48
8	0					45	0	0	42	42		1	0	0	0	0		0	0		63	0	0	7	7
4	0					11	0	0	31	31		0	0	0	0	0		9600	1800		43	0	1	2	3
						36	0	0	57	57		0	0	0	1	1		600	0		8	0	14	1	15
						57	0	0	66	66		0	0	0	0	0		5700	0		1	0	0	6	6
						0	0	0	128	128		0	0	1	0	1		1200	600		2	0	0	1	1
						17	0	0	99	99		3	0	0	1	1		1500	0		78	0	0	7	7
						59	0	0	11	11		0	0	0	16	16		300	0		15	0	4	0	4
						15	0	0	36	36		0	0	0	5	5		8400	0		0	0	0	1	1
						61	0	0	97	97		0	0	0	2	2		3300	0		5	0	3	5	8
						0	0	0	31	31		0	0	1	0	1		600	0		0	0	12	2	14
						62	0	0	42	42		0	0	0	7	7		1200	0		56	0	1	13	14
						45	0	0	76	76		1	0	1	19	20		2400	0		11	0	0	2	2
						2	0	0	4	4		0	0	0	2	2			3600		16	0	2	2	4
						42	0	0	17	17		1	0	0	3	3			600		64	0	1	1	2
						72	0	0	92	92		2	0	0	1	1					12	0	2	2	4
						19	0	0	133	133		3	0	0	1	1					4	0	15	7	22
						88	0	0	58	58		0	0	0	0	0					11	0	3	4	7
						79	0					1	0	0	1	1					7	0	7	3	10
						59	0					0	0	0	3	3					86	0	12	4	16
						102	0					0	0	0	8	8					8	0	13	4	17
						21	0					0	0	1	1	2					35	0	17	5	22
						63	0					2	0	0	2	2					58	0	2	0	2
						54	0					1	0	0	5	5					64	0	0	0	0
												1	0	0	5	5					69	0	13	6	19
												0	0	0	0	0					40	0	0	2	2
												0	0	0	4	4					34	0	0	0	0
												0	0	0	2	2					61	0	0	8	8
												0	0	0	0	0					16	0	7	0	7
												0	0	0	1	1					25	0	4	2	6
												0	0	0	1	1					32	0	0	4	4
												12	0	0	4	4					49	0	0	1	1
												29	0	0	0	0					28	0	5	0	5
												0	0	1	2	3					62	0	0	1	1
												0	0	2	0	2					13	0	13	0	13
												4	0	0	0	0					12	0	9	3	12
												0	0	1	1	2					22	0	18	1	19
												1	0	0	0	0					3	0	5	1	6
												2	0	0	5	5					100	0	21	1	22
												16	0	0	2	2					44	0	1	0	1
												0	0	0	2	2					51	0
												1	0	2	5	7					19	0
												0	0	4	2	6					33	0
												13	0	7	2	9					66	0
												12	0	0	0	0					28	0
												2	0	1	0	1					24	0
												12	0	1	0	1					38	0
												6	0	0	0	0					19	0
												0	0	0	2	2					53	0
												5	0	0	2	2					35	0
												33	0	0	1	1					45	0
												35	0	0	3	3					69	0
												11	0	4	0	4					7	0
												6	0								92	0
												2	0								28	0
												0	0								17	0
												6	0								5	0
												0	0								21	0
												7	0								63	0
												0	0								50	0
												38	0								67	0
												3	0								58	0
												0	0								61	0
												1	0								96	0
												2	0								34	0
												2	0								65	0
												1	0								13	0
												18	0								46	0
												31	0								69	0
												1	0								22	0
												2	0								19	0
												22	0								63	0
												26	0								30	0
												4	0								6	0
												0	0								4	0
												15	0								56	0
												2	0								66	0
												0	0								13	0
												2	0								73	0
												9	0								64	0
												17	0								39	0
												36	0								26	0
												5	0								58	0
												26	0								38	0
																					0	0
																					17	0
																					0	0
																					3	0
																					4	0
																					48	0
																					18	0
																					72	0
																					65	0
																					45	0
																					40	0
																					43	0

## Sheet: Figure 3
Fig 3A			Fig 3B
Control	CTL4null		Control	CTL4null
136	544		256	332
592	488		696	140
420	432		280	280
312	192		632	340
184	1500		904	228
992	236		744	124
500	544		328	132
120	488		512	268
532	696		192	244
572	264		516	260
536	516		120	152
548	124		624	52
288	236		64	80
316	360		80	40
236	348		168	96
204	164		92	172
908	1008		36	388
212	772		124	428
464	100		164	716
984	372		84	328
1268	476		12	532
1444	1216		208	500
1652	1332		404	440
140	716		320	104
416	732		432	308
1172			236	168
500			56	400
908			112
176			1080
1060			460
1372			736
752			280
852			532
292			380
592			368
			336
			276
			472
			268
			436
			492
			320
			148
			244
			380
			92
			340
			332
			184
			332
			576

## Sheet: Figure 4
Fig 4A									Fig 4B									Fig 4C									Fig 4D
Control	CTL4null_L	CTL4null_M	Control Ab	CTL4null Ab_L	CTL4null Ab_M	CTL4null A	CTL4null Ab_A		Control_dsGFP	Control_dsCaspar	dsGFP_L	dsGFP_M	dsCaspar_L	dsCaspar_M	dsGFP_A	dsCaspar_A		Control_dsGFP	Control_dsIMD	dsGFP_L	dsGFP_M	dsIMD_L	dsIMD_M	dsGFP_A	dsIMD_A		Control_dsGFP	Control_dsCaspar	dsGFP_L	dsGFP_M	dsGFP_A	dsCaspar_L	dsCaspar_M	dsCaspar_A
54	0	131	17	14	47	131	61		9	59	0	92	0	35	92	35		0	0	0	1	0	0	1	0		5	0	0	5	5	0	0	0
30	0	11	43	3	53	11	56		82	78	0	100	0	34	100	34		1	0	0	0	0	1	0	1		15	30	1	6	7	0	5	5
36	0	64	74	0	123	64	123		67	47	0	41	0	1	41	1		5	6	2	0	0	2	2	2		6	0	0	0	0	0	1	1
74	0	16	46	0	13	16	13		72	53	0	48	16	48	48	64		51	1	2	0	0	0	2	0		3	0	0	2	2	0	1	1
14	0	50	44	0	56	50	56		9	1	0	28	0	29	28	29		0	0	0	0	0	1	0	1		9	0	0	2	2	0	0	0
78	0	78	56	0	60	78	60		67	75	0	73	0	103	73	103		0	0	0	4	0	1	4	1		1	0	31	3	34	20	0	20
73	0	33	61	20	5	33	25		77	79	0	52	0	41	52	41		0	2	0	0	7	0	0	7		1	2	0	0	0	1	1	2
46	0	0	3	34	62	0	96		71	56	58	0	0	38	58	38		0	1	0	1	0	1	1	1		3	1	0	3	3	2	2	4
8	0	196	112	0	38	196	38		1	7	1	0	0	19	1	19		1	0	0	1	0	3	1	3		53	1	2	3	5	0	8	8
65	0	87	17	0	79	87	79		3	50	0	66	0	100	66	100		1	6	1	0	0	0	1	0		3	0	0	1	1	1	0	1
34	0	75	36	0	62	75	62		73	71	0	24	0	72	24	72		0	1	0	4	0	0	4	0		10	1	0	0	0	0	1	1
11	0	9	3	71	10	9	81		7	54	2	47	0	92	49	92		4	2	0	1	0	2	1	2		0	0	0	0	0	0	15	15
41	0	25	11	3	9	25	12		13	59	0	62	0	65	62	65		1	0	0	0	6	7	0	13		3	1	16	1	17	0	2	2
32	0	0	72	1	3	0	4		8	43	0	102	0	82	102	82		1	1	0	1	0	11	1	11		26	1	0	2	2	0	2	2
34	0	3	56	0	46	3	46		89	46	0	106	0	86	106	86		0	1	0	2	0	0	2	0		20	0	0	3	3	0	0	0
66	0	14	27	0	97	14	97		13	40	0	62	29	0	62	29		10	0	0	0	0	0	0	0		13	0	1	1	2	0	0	0
62	0	28	87	3	8	28	11		22	13	0	64	0	86	64	86		0	0	0	15	0	0	15	0		4	26	1	0	1	0	0	0
88	0	6	56	0	55	6	55		62	61	0	43	0	2	43	2		1	3	0	0	0	3	0	3		0	2	0	0	0	0	3	3
73	0	11	66	15	38	11	53		10	54	0	89	0	3	89	3		3	2	0	11	12	0	11	12		63	0	1	1	2	0	1	1
54	0	83	49	0	82	83	82		61	44	0	24	1	28	24	29		0	5	0	0	0	1	0	1		0	0	0	1	1	0	0	0
22	0	48	38	0	64	48	64		52	22	0	40	0	60	40	60		3	0	1	2	0	4	3	4		46	2	1	2	3	0	2	2
23	0	72	24	21	2	72	23		74	46	0	44	0	19	44	19		5	57	0	2	0	3	2	3		36	4	3	2	5	1	1	2
17	0	39	18	0	61	39	61		10	3	0	112	0	63	112	63		0	2	9	0	0	0	9	0		11	0	0	0	0	0	1	1
41	0	21	50	0	25	21	25		78	38	0	59	0	44	59	44		0	0	0	0	0	1	0	1		1	16	0	0	0	0	1	1
30	0	5	53	0	73	5	73		47	65	0	47	0	10	47	10		0	19	2	1	9	0	3	9		21	1	1	0	1	1	0	1
39	0	5	25	0	60	5	60		53	112			0	94		94		0	0	0	1	0	1	1	1		6	2	5	0	5	1	4	5
21	0	76	87	0	2	76	2		13	12			1	64		65		0	3	0	2	0	0	2	0		20	1	0	0	0	0	4	4
53	0	37	61	0	3	37	3		47	87			0	43		43		0	0	0	1	3	1	1	4			3	0	0	0	5	5	10
13	0	14	37	0	30	14	30		6	51			2	15		17		26	0	0	1	0	0	1	0			4	0	1	1	3	0	3
61	0	97	37	0	55	97	55		28	8			0	24		24		0	1	3	4	45	0	7	45			2	0	0	0	7	7	14
29	0	14	19	1	5	14	6		14	22			0	80		80		0	10	0	4	0	6	4	6			10	0	0	0	8	3	11
8	0	70	27	0	29	70	29		44	81			0	73		73		9	0	0	3	1	3	3	4			5	0	0	0	10	6	16
26	0	1	25	1	9	1	10		26	8			0	68		68		1	0	0	0	0	0	0	0			18	0	0	0	12	5	17
0	0	85	110	0	97	85	97		109	67			2	26		28		1	2	0	2	0	0	2	0			0	1	0	1	1	5	6
81	0	6	63	0	32	6	32		43	7			0	58		58		2	0	0	2	0	0	2	0			9	0	0	0	8	6	14
70	0	8	36	0	102	8	102			3			0	28		28		1	20	0	0	0	2	0	2			2	14	0	14	0	1	1
30	0	63	55	3	3	63	6			71			0	73		73		2	0	2	0	3	0	2	3			9	17	3	20	6	1	7
55	0	106	64	0	46	106	46			14			0	63		63		17	54	0	9	0	0	9	0			0	7	2	9	2	3	5
52	0	37	42	1	64	37	65			14			0	32		32		1	2	0	1	37	5	1	42			0	0	4	4	0	3	3
83	0	11	35	7	1	11	8			18			0	56		56		0	31	5	1	28	2	6	30			0	6	0	6	2	0	2
10	0	89	42	0	66	89	66			30			0	25		25		1	15	0	1	2	0	1	2			39	0	2	2	7	1	8
28	0	23	38	0	1	23	1			58			0	28		28		0	5	0	3	33	2	3	35			0	24	10	34	0	4	4
70	0	66	96	0	20	66	20			0			0	32		32		0	0	0	24	0	1	24	1			0	7	1	8	18	6	24
26	0	2	54	0	57	2	57			71			0	103		103		0	63	0	8	17	0	8	17			35	3	7	10
45			24	0	0		0			33			0	86		86		0	0	0	3	0	2	3	2			0	15	2	17
23			89	1	73		74			21			0	78		78		2	18	7	2	4	0	9	4			23	6	11	17
21			61	0	32		32						0	89		89		0	56	41	0	0	0	41	0			8	4	2	6
48			21	0	73		73						0	83		83		1	0	0	7	0	0	7	0				21	2	23
74			12	0	31		31						0	20		20		1	20	0	0	2	0	0	2				17	9	26
80			47	0	64		64						0	40		40		0	0	0	0	0	1	0	1				1	1	2
61			47	0	38		38						0	56		56		0	16	0	0	31	2	0	33				5	1	6
48			79	0	16		16						0	90		90		0	27	0	1	0	3	1	3				10	2	12
11			98	0	82		82						0	52		52		0	6	0	2	19	2	2	21				5	1	6
25			52	1	42		43						0	49		49		0	0	9	0	14	1	9	15				6	1	7
22			43	5	16		21						0	47		47		0	1	0	3	45	0	3	45				20	1	21
69			59	0	43		43											57	60	0	2	5	4	2	9				0	0	0
53			102	0	3		3											41	57	0	1	0	1	1	1				9	2	11
53			79	9	74		83											6	0	0	0	0	0	0	0				0	28	28
58			22	0	88		88											0	1	0	0	1	1	0	2				6	0	6
22			30	0	54		54											0	0	0	0	35	1	0	36				10	5	15
44			35	0	27		27											16	73			0	0		0
86			17	0	37		37											0	2			0	1		1
24			52	0	47		47											0	47			1	10		11
40			22	0	60		60											0	1			0	5		5
6			43	0	87		87											1	1			0	0		0
35			104	0	78		78											7	1			3	1		4
39			56	0	44		44											65	0
49			48	0	154		154											0	0
89				0	116		116											0	0
104				2	86		88											0	19
13																		58	0
21																		0	0
48																		0	66
18																		0	0
72																		45	36
42																		27	0
62																		1	0
59																		1	0
65																		1	0
18																		1	21
66																		1	0
99																		0	0
5																		0	5
17																		0	0
2																		0	0
54																		21
68																		0
1																		62
78																		0
21																		42
77																		0
13																		0
48																		0
																		0
																		2
																		0
																		0
																		0
																		0
																		2
																		0
																		0
																		16
																		0
																		0
																		29
																		0
																		0
																		31
																		0
																		0
																		0

## Sheet: Figure 5
Fig 5A						Fig 5B							Fig 5C
ookinetes in lumen			oocysts			ookinetes in epithelium			oocysts				Control_19°C	Control_27°C	19°C_L	19°C_M	27°C_L	27°C_M	19°C_A	27°C_A
19°C_24h	19°C_40h	27°C_24h	19°C_13d	27°C_8d		19°C_24h	19°C_40h	27°C_24h	27°C_40h	19°C_13d	27°C_8d		0	0	0	0	20	0	0	20
42	132	128	60	3		6	3	28	46	19	75		1	0	0	0	0	2	0	2
12	148	224	72	104		1	4	16	22	5	7		0	0	0	6	14	1	6	0
18	100	212	66	117		5	4	13	2	3	22		0	0	0	6	7	4	6	11
6	24	200	1	107		4	2	8	8	44	40		0	0	0	3	5	7	3	12
0	68	96	72	127		2	5	16	3	2	69		0	1	0	1	0	3	1	3
6	52	500	71	10		3	11	14	26	4	45		0	3	0	1	1	3	1	4
0	124	188	40	87		2	2	39	27	3	25		0	1	0	0	0	0	0	0
18	72	152	1	89		2	7	32	168	33	1		0	0	0	0	5	9	0	14
54	136	200	82	161		4	7	10	46	4	5		0	2	0	1	2	22	1	24
12	16	24	69	63		0	13	11	14	4	33		0	0	0	2	0	1	2	1
36	48	324	0	86		10	6	72	65	2	22		0	97	0	0	5	0	0	5
24	116	264	45	101		0	9	18	158	6	61		0	41	0	0	0	0	0	0
36	36	304	39	103		3	2	19	89	8	29		0	0	0	1	0	0	1	0
6	64	152	0	178		3	0	7	21	0	14		0	0	0	1	6	0	1	6
0	52	156	0	93		4	5	43	172	18	39		0	4	0	2	0	12	2	12
6	20	16	68	99		4	4	62	94	16	3		0	0	0	0	0	0	0	0
6	76	176	37	4		4	3	45	105	3	3		0	34	0	0	2	1	0	3
12	216	8	96	30		5	7	53	112	3	72		0	7	0	0	4	2	0	6
0	64	124	0	95		2	3	30	22	20	69		0	0	0	0	3	0	0	3
30	32	128	102	8		2	6	19	131	8	47		0	10	0	0	0	1	0	1
18	36	8	72	112		3	0	10	50	1	59		0	21	0	2	0	6	2	6
24	76	224	3	175		6	3	42	49	6	49		0	0	0	0	0	0	0	0
30	32	180	102	81		4	6	179	68	13	77		0	0	0	1	1	0	1	1
6	40	76	0	59		8	0	28	108	0	69		0	0	0	2	2	0	2	2
			40	159		5	17	98	64	6	60		0	3	0	0	0	0	0	0
			1	140		6	4	34	27	13	61		0	2	0	0	0	0	0	0
			59	97		4	2	17	4	2	88		1	5	0	0	1	0	0	1
			0	22		8	1	52	2	0	82		0	1	0	2	4	0	2	4
			50	51		5	5	6	59	0	74		0	3	0	4	0	0	4	0
			49	95		6	6	44	21	7	69		0	0	0	0	0	0	0	0
			66	34		4	19	33	42	4	71		0	53	0	0	0	1	0	1
			24	120		9	4	16	84	0	98		0	0	0	4	2	0	4	2
			1	119		4	12	13	228	5	49		0	0	0	0	0	0	0	15
			4	79		3	2	107	70	4	56		0	0	0	0	0	0	0	0
			69	60		3	0		12	4	102		0	1
			14	12		7	6	39	8	3	48		0	0
			55	163		4	13	151	38	0	45		0	1
			21	98		3	4	10	44	9	112		0	1
			30	145		4	5	20	22	6	44		0	38
				68		2	14	66	117	4	19		0	0
						0	0	124	27		52		0	12
						4	6	81	17		71		0	0
						4	1	88	30		7		0	2
						4	6	59	158		14		0	4
						6	15	115	69		6		0	1
							8	138	50		5		0	0
							5	99	64		3		0	0
							1	116	172				0	22
							6	91	44				0	5
							17	182	16				0	2
							8	218	91				0	0
							19		37				0	0
							4		16				0	1
							2		49				0
							0		16
							11		99
							4

## Sheet: Figure 6
Fig 6A					Fig 6C										Fig 6D						Fig 6H
Control	CTL4null				Days	Control PBS	CTL4null PBS	Control Ec	CTL4null Ec	Control Sa	CTL4null Sa	Control Bs	CTL4null Bs		Control		CTL4null				Days	Control	CTL4null
13000	17000				1	1	1		1			1	1		Ec	Sa	Ec	Sa			1	1	1
0	13000				1	1						1			83.33	68.42	98.2	84.21			1	1
0	0				1							1			94.7	80	90	66.7			1		1
12600	16600				1		1	1		1	1	1	1								2	1
12	16600				1			1		1	1	1	1		Fig 6F						2	1
0	0				1			1		1	1	1				Control L	Control M	CTL4null L	CTL4null M		2	1	1
4	0				1			1		1		1			24 h	100	0	0	100		2		1
10000	17000				1					1					48 h	93.33	6.66	13.34	86.66		3	1
10400	14000				1					1					72 h	93.75	6.25	6.25	93.75		3	1
2	22				1					1					5 days	57.15	42.85	0	100		3	1
16000	16000				1			1			1				7 days	80	20	0	100		3	1
0	0				2		1	1	1	1	1	1	1								3	1
11200	18000				2		1	1	1	1	1										3	1
10800	17000				2				1	1	1										3	1
0	12				2				1	1	1										3	1
2	0				2					1	1										3	1
12400	15000				2					1											3	1
0	30				2					1											3	1
0	0				2					1											3	1
10600	15400				2					1											3	1
					2	1	1	1	1	1	1	1	1								3	1
Fig 6B					2		1	1	1	1	1	1	1								3	1
Control		CTL4null			2				1	1	1										3	1
Sugar	Blood	Sugar	Blood		2					1	1										3	1
0.113416	10.7142	-1.49141	4.85726		2					1	1										3	1
-0.132088	10.3168	-0.0523863	5.56311		2					1	1										3	1
-1.07091	9.58186	-3.46942	5.75148		2					1											4	1	1
					2					1											4	1	1
					2					1											4	1	1
					2					1											4		1
					2					1											4		1
					2			1	1	1	1	1									4		1
					2			1	1	1											4		1
					2				1	1											4	1	1
					2					1											4	1	1
					2					1											4	1	1
					3			1	1	1	1										4	1	1
					3			1	1		1										4	1	1
					3			1	1												4	1	1
					3			1	1												4	1	1
					3			1	1												4	1
					3			1													4	1	1
					3			1													4	1	1
					3	1	1	1	1	1	1	1	1								4	1
					3	1		1	1	1	1										5	1	1
					3				1	1											5	1	1
					3					1											5		1
					3	1		1	1			1	1								5		1
					3				1			1	1								5		1
					3				1				1								5		1
					3				1												5		1
					4	1		1	1	1	1										5		1
					4			1	1	1	1										5	1	1
					4			1	1	1	1										5	1	1
					4			1	1		1										5	1	1
					4				1		1										5	1	1
					4				1		1										5	1	1
					4				1												5	1	1
					4				1												5	1
					4				1												5	1
					4				1												5	1	1
					4				1												5		1
					4				1												5		1
					4	1		1	1	1	1	1	1								6		1
					4	1		1	1		1										6		1
					4	1			1												6		1
					4				1												6	1	1
					4				1												6	1	1
					4				1												6	1
					4				1												6	1
					4				1												6	1
					4				1												6	1
					4				1												6	1
					4			1	1	1	1	1									6	1
					4			1	1	1											6	1
					4	1	1	1	1												7	1	1
					4				1												7	1	1
					4				1												7		1
					4				1												8		1
					4				1												8		1
					4				1												8		1
					4				1												8		1
					4				1												9		1
					4				1												9	1
					4				1												10		1
					4				1												11		1
					5			1	1		1	1									11		1
					5			1	1		1										11		1
					5			1	1		1										11	1	1
					5			1	1		1										12		1
					5	1		1	1												12		1
					5				1												12		1
					5	1	1	1	1	1	1	1	1								12	1
					5			1	1	1	1		1								12	1
					5			1	1												12	1
					5			1	1												15		1
					5			1	1												15		1
					5			1	1												15		1
					5			1	1												15		1
					5			1	1												15		1
					5			1	1												15		1
					5			1	1												15		1
					5			1	1												15		1
					5			1	1												15		1
					5			1	1												15		1
					5				1												15		1
					5	1		1	1				1								17	1
					5	1		1	1												17	1
					5			1	1												18		1
					5				1												18		1
					5				1												20		1
					6			1	1	1	1		1								21		1
					6			1	1		1										22	1
					6			1	1												27		1
					6			1
					6			1
					6			1	1		1	1
					6						1
					6		1	1	1		1		1
					6		1		1
					6				1
					7	1	1	1	1	1	1
					7						1
					7						1
					7	1	1	1	1			1
					7			1				1
					7			1
					7		1	1	1	1	1
					7			1	1		1
					7			1	1
					7			1
					8	1	1	1	1	1	1	1	0
					8	1	1		0	0	1	0	0
					8	0	0	0	0	0	1	0	0
					8	0	0	0	0	0	0	0	0
					8	0	0	0	0	0	0	0	0
					8	0	0	0	0	0	0	0	0
					8	0	0	0	0	0	0	0	0
					8	0	0	0	0	0	0	0	0
					8	0	0	0		0	0	0	0
					8	0	0	0		0	0	0	0
					8	0	0	0		0	0	0	0
					8	0	0	0		0	0	0	0
					8	0	0	0		0	0	0	0
					8	0	0	0		0	0	0	0
					8	0	0	0		0	0	0	0
					8	0	0	0		0	0	0	0
					8	0	0	0		0	0	0
					8	0	0			0	0	0
					8	0	0			0		0
					8	0	0			0
					8	0	0			0
					8	0	0			0
					8	0	0			0
					8	0	0			0
					8	0	0			0
					8	0	0
					8	0	0
					8	0	0
					8	0	0
					8	0	0
					8	0
					8	0
					8	0
					8	0
					8	1	0	1	1	0	1	1	0
					8	0	0	1	0	0	1	0	0
					8	0	0	0	0	0	0	0	0
					8	0	0	0		0	0	0	0
					8	0	0	0		0	0	0	0
					8	0	0	0		0	0	0	0
					8	0	0			0	0	0	0
					8	0	0			0	0	0	0
					8	0	0			0	0	0	0
					8	0	0			0	0	0	0
					8	0	0				0	0	0
					8	0	0				0	0	0
					8	0	0				0	0	0
					8	0	0				0	0	0
					8	0	0				0	0	0
					8	0	0				0	0	0
					8	0	0					0	0
					8	0	0					0	0
					8	0	0					0	0
					8	0	0					0	0
					8	0	0					0	0
					8	0	0					0	0
					8	0	0						0
					8	0	0
					8	0	0
					8	0	0
					8	0	0
					8	0	1	1	0	1	1	0	1
					8	0	0	1	0	0	0	0	1
					8	0	0	0	0	0	0	0	1
					8	0	0	0		0	0	0	0
					8	0	0	0		0	0	0	0
					8	0	0	0		0	0	0	0
					8	0	0	0		0	0	0	0
					8	0	0	0		0	0	0	0
					8	0	0	0		0	0	0	0
					8	0	0	0		0	0	0	0
					8	0	0	0		0	0	0	0
					8	0	0	0		0	0	0	0
					8	0	0	0		0	0	0	0
					8	0	0	0		0	0	0	0
					8	0	0	0		0	0	0	0
					8	0	0	0		0	0	0	0
					8	0	0	0		0	0	0	0
					8	0	0	0		0	0	0	0
					8	0	0	0		0	0	0	0
					8	0	0	0		0	0	0	0
					8	0	0			0	0	0	0
					8	0	0			0	0	0	0
					8	0	0			0	0	0	0
					8	0	0			0	0	0	0
					8	0	0			0	0	0	0
					8	0	0				0	0	0
					8	0	0					0	0
					8	0	0					0	0
					8	0	0						0
					8	0	0						0
					8	0	0

## Sheet: Figure 7
Fig 7A									Fig 7B									Fig 7C									Fig 7D							Fig 7E									Fig 7F
Control dsGFP	Control dsCTLMA2	dsGFP_L	dsGFP_M	dsCTLMA2_L	dsCTLMA2_M	dsGFP_A	dsCTLMA2_A		Control_dsGFP	Control_dsLRIM1	dsGFP_L	dsGFP_M	dsLRIM1_L	dsLRIM1_M	dsGFP_A	dsLRIM1_A		Control_dsGFP	Control_dsTEP1	dsGFP_L	dsGFP_M	dsTEP1_L	dsTEP1_M	dsGFP_A	dsTEP1_A		CTL4null_dsGFP_L	CTL4null_dsGFP_M	CTL4null_dsTEP1_L	CTL4null_dsTEP1_M	dsGFP_A	dsTEP1_A		Control_dsGFP	Control_dsCLIPA2	dsGFP_L	dsGFP_M	dsCLIPA2_L	dsCLIPA2_M	dsGFP_A	dscLIPA2_A		Control_dsGFP	Control_dsCLIPA14	dsGFP_L	dsGFP_M	dsCLIPA14_L	dsCLIPA14_M	dsGFP_A
1	22	0	13	4	2	13	6		51	16	0	1	3	0	1	3		48	6	7	1	0	2	8	2		0	37	32	1	37	33		42	0	0	6	0	0	6	0		42	3	0	6	0	5	6
7	0	2	0	1	0	2	1		57	48	0	3	36	0	3	36		0	9	5	0	9	0	5	9		0	44	1	0	44	1		0	20	0	1	0	2	1	2		0	2	0	1	1	5	1
0	19	0	2	0	2	2	2		41	3	8	0	1	0	8	1		0	5	0	1	5	0	1	5		0	8	28	4	8	32		0	33	0	5	0	0	5	0		0	0	0	5	0	8	5
18	7	0	2	0	3	2	3		6	58	0	1	16	1	1	17		15	2	1	4	1	22	5	23		0	20	42	0	20	42		1	0	0	4	0	3	4	3		1	9	0	4	34	13	4
18	5	0	1	0	7	1	7		10	0	11	0	0	1	11	1		2	1	2	4	0	0	6	0		0	33	36	0	33	36		0	3	4	3	0	0	7	0		0	3	4	3	2	3	7
59	0	1	0	2	1	1	3		0	75	0	0	0	2	0	2		1	10	0	2	0	4	2	4		0	17	31	2	17	33		0	3	2	3	0	10	5	10		0	1	2	3	0	4	5
0	25	4	3	1	3	7	4		16	7	26	0	30	2	26	32		4	25	0	0	6	0	0	6		0	37	52	0	37	52		35	0	12	1	0	2	13	2		35	6	12	1	0	10	13
26	7	0	1	0	1	1	1		62	2	6	1	3	2	7	5		0	6	0	1	0	8	1	8		0	17	45	0	17	45		19	7	0	0	11	1	0	12		19	0	0	0	0	11	0
18	26	10	0	6	2	10	8		0	19	21	21	0	0	42	0		13	7	0	2	0	0	2	0		0	34	7	0	34	7		4	0	36	3	0	1	39	1		4	3	36	3	14	27	39
1	12	0	0	0	1	0	1		2	4	3	2	28	7	5	35		3	10	22	5	0	2	27	2		0	0	33	0	0	33		3	2	0	1	1	1	1	2		3	0	0	1	0	0	1
20	1	58	0	10	2	58	12		26	35	0	1	0	2	1	2		0	11	1	0	0	0	1	0		0	35	27	0	35	27		2	0	0	6	0	5	6	5		2	0	0	6	24	0	6
14	0	0	0	0	2	0	2		7	2	0	0	0	8	0	8		4	3	0	0	1	1	0	2		0	33	35	0	33	35		1	0	0	0	3	1	0	4		1	0	0	0	8	8	0
2	14	16	2	0	0	18	0		65	73	48	0	55	2	48	57		0	7	0	0	6	1	0	7				16	8		24		0	0	1	0	6	0	1	6		0	23	1	0	3	4	1
0	20	0	0	0	0	0	0		42	0	11	1	42	2	12	44		39	6	0	4	25	0	4	25				26	4		30		6	0	0	0	3	2	0	5		6	0	0	0	8	14	0
11	1	0	0	0	1	0	1		31	2	0	0	0	0	0	0		1	25	5	0	0	0	5	0				7	1		8		1	45	0	3	0	3	3	3		1	1	0	3	4	26	3
3		9	1	7	0	10	7		16	2	29	2	22	0	31	22		3	0	3	0	0	3	3	3				8	2		10		0	0	6	8	0	1	14	1		0	4	6	8	0	4	14
17		11	0	0	5	11	5		58	29	57	0	49	2	57	51		0	5	0	2	3	2	2	5				6	0		6		7	0	0	0	0	2	0	2		7	5	0	0	0	12	0
25		0	6	2	1	6	3		21	11	0	1	2	0	1	2		1	53	1	0	3	2	1	5				16	0		16		0	43	0	3	1	2	3	3		0	0	0	3	3	26	3
21		4	2	16	0	6	16		29	15	2	0	14	2	2	16		11	11	42	0	13	1	42	14				33	0		33		7	8	0	0	0	2	0	2		7	14	0	0	0	0	0
0		4	3	0	0	7	0		0	1	0	9	25	1	9	26		0	17	0	0	0	4	0	4				26	0		26		1	0	2	2	0	10	4	10		1	0	2	2	1	0	4
0		21	0	0	0	21	0		45	0	0	1	5	1	1	6		1	1	0	0	13	20	0	33				9	0		9		3	0	4	5	0	3	9	3		3	14	4	5	0	6	9
2		0	0	0	5	0	5		27	3	5	1	0	3	6	3		2	1	5	0	1	2	5	3				6	0		6		0	0			2	23		25		0	0	1	0	0	3	1
11		2	0	0	0	2	0		3	0	26	1	19	2	27	21		0	20	12	7	1	0	19	1				35	2		37		36	0								36	2	0	0	0	0	0
9		0	0	1	1	0	2		0	0	0	3	10	0	3	10		2	3	28	0	15	0	28	15				17	4		21		0	0								0	5	0	5	0	16	5
5		0	0	0	6	0	6		2	3	9	24	0	0	33	0		1	0	12	0	4	2	12	6				8	0		8		0	0								0	9	1	0	0	3	1
0		0	13	6	7	13	13		8	7	0	8	13	2	8	15		17	22	3	0	0	2	3	2				30	1		31		14	8								14	5	0	0	1	2	0
49		18	0	0	7	18	7		0	6	0	3	7	2	3	9		0	0	2	0	0	0	2	0				10	15		25		3	0								3	2	0	0	0	0	0
10		2	6	0	0	8	0		1	0	7	2	5	0	9	5		12	18	12	0	0	0	12	0				31	0		31		6	0								6	1	0	0	26	5	0
11		2	0	1	2	2	3		31	2	41	0	0	0	41	0		0	15	0	0	6	0	0	6				7	1		8			1								7	3	0	4	0	6	4
5		18	1	11	2	19	13		1	0	0	4	43	0	4	43		54	53	7	1	0	0	8	0				34	1		35			1								0	0	0	0	1	4	0
5		0	1	0	4	1	4		16	11	0	0	6	0	0	6		5	0	0	0	12	0	0	12										0								2	2	0	1	0	7	1
33		2	0	0	4	2	4		0	1	8	5	7	2	13	9		0	0	0	0	6	0	0	6										3								4	0	0	1	0	3	1
15		0	1	0	2	1	2		44	8	0	0	4	3	0	7		7	23	1	1	1	2	2	3																		0	3	0	2	0	1	2
0		0	0	0	2	0	2		0	3	0	1	27	1	1	28		2	5	2	3	18	0	5	18																		0	1	2	2	0	8	4
21		9	0	0	1	9	1		0	3	1	1	19	2	2	21		0	9	0	5	17	0	5	17																		3	3	0	0			0
16		9	1	0	1	10	1		0	2	30	2	1	0	32	1		0	0	0	17	37	1	17	38																		1	2	0	2			2
		4	4	0	0	8	0		1	16	8	5	0	0	13	0		1	1	7	9	0	0	16	0																		0	4	0	1			1
		0	0	0	0	0	0		3	12	1	3	0	0	4	0		1	3	3	1	2	1	4	3																		2	0	0	1			1
		8	0	0	0	8	0		0	2	22	1	0	1	23	1		0	0	0	2	0	0	2	0																		1	1	0	1			1
		60	3	20	0	63	20		3	1	0	0	16	0	0	16		4	2	0	1	1	1	1	2																		0	2	0	0			0
		15	1	0	0	16	0		4	1	0	0	1	1	0	2		2	3	0	1	0	9	1	9																		0	0	1	1			2
		0	4	0	0	4	0		17	2	1	0	2	0	1	2		1	5	0	0	0	2	0	2																		0	0	0	3			3
		5	2	0	0	7	0		26	46	2	3	0	1	5	1		1	1	2	0	0	4	2	4																		0	4	0	0			0
		9	0	0	0	9	0		3	1	10	7	0	0	17	0		0	5	2	0	0	1	2	1																		1	2	0	1			1
		0	4	17	0	4	17		5	13	0	1	5	0	1	5		3	0	0	0	0	7	0	7																		2	2	5	0			5
		1	3	0	1	4	1		2	0	0	2	0	6	2	6		4	2	0	4	0	1	4	1																		0	6	0	1			1
		0	0	0	2	0	2		20	29	1	1	0	2	2	2		0	5	0	0	0	2	0	2																		4		2	3
		0	0	0	0	0	0		9		38	0	0	0	38	0		0	6	0	1	0	0	1	0																		2
		0	1	0	0	1	0		6		0	0	1	1	0	2		0	2	0	1	0	0	1	0																		0
		0	0	0	0	0	0		14		0	0	2	2	0	4		0	5	1	0	1	13	1	14																		1
		0	1	0	0	1	0		5		0	0	33	2	0	35		0	0	0	4	0	0	4	0																		7
		0	3	0	0	3	0		26		6	2	3	1	8	4		1	0	0	1	0	0	1	0																		2
		0	1	0	2	1	2		0		0	0	0	3	0	3		5	1	0	0	3	5	0	8																		2
		0	1	0	5	1	5		0		9	5	2	2	14	4		0	1	0	1	0	0	1	0																		0
		0	0			0			1				9	0		9		0	1	0	2	0	0	2	0																		0
		0	0			0							6	2		8		0	2	0	0	0	0	0	0
		0	3			3							0	0		0		26	0	0	15	0	0	15	0
		45	0			45							0	0		0		0	0	0	0	1	0	0	1
		0	1			1							0	2		2		1	0	0	11	1	0	11	1
		1	0			1							23	6		29		1	0	0	0	0	1	0	1
		0	3			3							0	3		3		2	1	1	2	0	1	3	1
		2	0			2							2	5		7		4	5	0	2	1	0	2	1
													0	0		0		1	55	9	0	1	2	9	3
													3	0		3		1	0	0	0	0	0	0	0
													9	2		11		0	1	2	1	0	6	3	6
													1	3		4		0	0	0	1	0	0	1	0
													13	0		13		0		0	2	0	0	2	0
													20	2		22		1		0	1	0	0	1	0
													0	1		1		3		0	1	0	0	1	0
													0	2		2		0		3	4	0	1	7	1
													0	0		0		3		0	4	0	0	4	0
													2	1		3		5				0	0		0
													7	0		7		0				0	1		1
													6	2		8		0				2	5		7
													1	1		2		8				0	0		0
													2	3		5		0				0	1		1
													0	2		2		0
																		0
																		1
																		0
																		0
																		9
																		1
																		1
																		2
[truncated: 1 more columns]

## Sheet: Figure S2
Fig S2A				Fig S2B
X1	Cas9	CTL4-gRNA		X1	Cas9	CTL4-gRNA
0	0	3		4	11	3
0	0	3		6	16	4
2	0	0		0	1	6
0	2	0		1	1	6
0	0	0		8	17	1
0	0	1		0	0	5
3	2	0		9	3	9
0	0	0		3	0	1
0	0	0		7	6	36
0	0	1		3	2	6
2	1	0		0	9	3
0	0	2		0	10	43
1	0	5		54	0	15
2	0	0		0	8	1
0	3	0		0	41	3
2	0	1		51	2	4
0	0	1		5	3	7
1	0	0		0	1	8
2	0	29		4	74	3
4	0	2		47	9	3
5	0	1		65	2	1
25	0	1			8	22
1	1	1			25	0
0	0	0			1	0
0	2	0			8	2
	2	0			4	0
	0	0			1	0
	2	0			0	4
		0			7	0
					32	1
					5	9
					8	0
					6	0
					3	2
					0	14
					16	0
					1	1
					3	12
					8	0
					9	0
						23
						4
						1
						3
						1
						5
						26

## Sheet: Figure S3
Fig S3A				Fig S3B				Fig S3C
Days	Control	CTL4-KO		Days	Control	CTL4-KO		Days	Control	CTL4-KO
1	1			1	1			1	1
2		1		2	1			1	1
2	1	1		3		1		1	1
2	1			3		1		2		1
2	1			4	1	1		2		1
5		1		4		1		2	1	1
7	1	1		4		1		2	1	1
7		1		4		1		2	1
7		1		4		1		2	1
7		1		5	1	1		2	1
8	1	1		5	1			2	1
8		1		5	1			3	1	1
9	1			5	1	1		3	1
10	1	1		6	1			4		1
11	1			6	1	1		4		1
11	1			7	1			4		1
11		1		8		1		4		1
12	1			9	1			6	1
13		1		9		1		9		1
14	1	1		10		1		14		1
14	1	1		11		1		14		1
14		1		12	1			19		1
15	1	1		12	1	1		20		1
15	1			12	1	1		20		1
15		1		12	1			21		1
16	1			13	1	1		21		1
16	1			13	1			22	1	1
16	1			13	1			23		1
17		1		13	1			23		1
17	1	1		13		1		28	1	1
18		1		13		1		28		1
18		1		14	1			29	1	1
18	1	1		14	1	1		29	1
18	1	1		15	1	1		29	1	1
18	1			15	1	1		30	1	1
18	1			15		1		30	0	1
19	1	1		15	1	1		35	1	0
19	1			15	1			36	1	1
19	1	1		16	1	1		38		1
19	1	1		16	1			39	1	1
19	1	1		16	1			40	0	0
19	1			16	1			40	0	0
19	1			17	1	1		40	0	0
19	1			17	1	1		40	0	0
20		1		17	1	1		40	0	0
20		1		17	1	1		40	0	0
20	1	1		17	1	1		40	0	0
20	1	1		17	1			40	0	0
20	1	1		17	1	1		40	0	0
21	1			17		1		40	0	0
21	1	1		18	1	1		40	0	0
21	1	1		18		1		40	0	0
21	1	1		18	1	1		40	0	0
21		1		18	1	1		40	0	0
21		1		18	1			40	0	0
21		1		19	1	1		40	0	0
22	1			19	1	1		40	0	0
22	1			19		1		40	0	0
22	1	1		19	1	1		40	0	0
22	1	1		19		1		40	0	0
23	1	1		20	1	1		40	0	0
23	1	1		20	1	1		40	0	0
23	1	1		20	1	1		40	0	0
23	1	1		20	1	1		40	0	0
24		1		20	1			40	0	0
24		1		21	1	1		40	0	0
24		1		21	1	1		40	0	0
22		1		21	1			40	0	0
22		1		21		1		40	0	0
22		1		22	1	1		40	0	0
23	1	1		22	1	1		40	0	0
23		1		22	1			40	0	0
23	1	1		23	1			40	0	0
23		1		23	1			40	0	0
23		1		23	1			40	0	0
24	1			23	1			40	0	0
24	1			24	1			40	0	0
24	1			24	1			40	0	0
24	1			24	1			40	0	0
25	1	1		26		1		40	0	0
25	1	1		26		1		40	0	0
25	1	1		27	1	1		40	0	0
25	1	1		27	1	1		40	0	0
25	1	1		28	1			40	0	0
25		1		28	1	1		40	0	0
25		1		28	1			40	0	0
25	1			29	1	1		40	0	0
25	1			29	1			40	0	0
25	1			30	1	1		40	0	0
26	1			30	1	0		40	0	0
26	1			30	1	0		40	0	0
27	1	1		31		1		40	0	0
27		1		31		1		40	0	0
26	1	1		32		1		40	0	0
26		1		32		1		40	0	0
26	1			34	1	1		40	0	0
27	1	1		34		1		40	0
27		1		34		1		40	0
27	1	1		35	1	1		40	0
27		1		37	1	0		40	0
28	1	1		38	1	1		40	0
28		1		39		1		40	0
28	1	1		40	1	0		40	0
29	1	1		40		0
29	1	1		40		0
29	1			40		0
28		1		40	0	0
29	1	1		40	0	0
29	1	1		40	0	0
29	1			40	0	0
29	1			40	0	0
29	1			40	0	0
30		1		40	0	0
30		0		40	0	0
30	1	1		40	0	0
30	1	1		40	0	0
30	1	1		40	0	0
30	1	1		40	0	0
30	1	1		40	0	0
30	1	1		40	0	0
30	1	1		40	0	0
30	1	1		40	0	0
31	1	1		40		0
31	1			40		0
31	1			40		0
31	1	1		40		0
31	1
32	1	1
32	1	1
34	1	1
36	1	1
37	1	1
38	1	1
39	1	1
39	1	0
39	1	1
39	1	0
40	1
40	0
40	0	0
40	0	0
40		0
40		0

## Sheet: Figure S4
Fig S4
Control L	Control M	CTL4null L	CTL4null M	CTL4null A		Control L	Control M	CTL4null L	CTL4null M	CTL4null A		Control L	Control M	CTL4null L	CTL4null M	CTL4null A		Control L	Control M	CTL4null L	CTL4null M	CTL4null A		Control	CTL4null		Control	CTL4null L	CTL4null M	Control Ab	CTL4null Ab_L	CTL4null Ab_M	CTL4null A	CTL4null Ab_A		Control_dsGFP	Control_dsCaspar	dsGFP_L	dsGFP_M	dsCaspar_L	dsCaspar_M	dsGFP_A	dsCaspar_A		Control_dsGFP	Control_dsIMD	dsGFP_L	dsGFP_M	dsIMD_L
6			11	11		13			13	13		2		2	6	8		32		5	1	6		2700	2700		54		131	17	14	47	131	61		9	59	58	92	16	35	92	35		1	6	2	1	6
12			13	13		5			8	8		3		1	2	2		84		1	1	2		2700	1200		30		11	43	3	53	11	56		82	78	1	100	29	34	100	34		5	1	2	4	3
43			78	78		98			99	99		3		2	3	3		6		2	4	2		6000	1500		36		64	74	20	123	64	123		67	47	2	41	1	1	41	1		1	2	1	1	1
2			6	6		53			72	72		3		1	1	1		42		5	2	5		3900	1200		74		16	46	34	13	16	13		72	53		48	1	48	48	64		1	1	1	1	3
6			8	8		81			53	53		2		1	4	4		55		2	1	2		1800	1800		14		50	44	71	56	50	56		9	1		28	2	29	28	29		2	6	9	4	7
5			21	21		5			21	21		2		1	2	2		2		10	1	10		1200	2100		78		78	56	3	60	78	60		67	75		73	2	103	73	103		4	1	2	1	37
24			6	6		78			33	33		3		1	5	5		2		6	3	4		1800	900		73		33	61	1	5	33	25		77	79		52		41	52	41		1	2	3	1	28
4			2	2		89			95	95		5		1	4	5		60		14	2	8		1800	600		46		196	3	3	62	196	96		71	56		66		38	58	38		1	1	2	2	2
28			21	21		69			107	108		3		2	4	4		34		9	1	1		4500	600		8		87	112	15	38	87	38		1	7		24		19	1	19		1	1	5	15	33
56			4	4		36			4	4		1		1	1	1		62		2	4	15		1200	600		65		75	17	21	79	75	79		3	50		47		100	66	100		3	3	9	11	35
13			12	12		20			39	39		2		2	3	3		26		16	14	12		6900	300		34		9	36	1	62	9	62		73	71		62		72	24	72		3	2	7	2	17
87			13	13		30			80	80		5		4	4	4		16		8	2	2		6900	1800		11		25	3	1	10	25	81		7	54		102		92	49	92		5	5	41	2	45
1			9	9		63			37	37		7		7	2	2		43		5	7	18		900	600		41		3	11	3	9	3	12		13	59		106		65	62	65		1	2		1	4
25			3	3		53			47	47		1		1	1	1		13		10	3	9		6000	3600		32		14	72	1	3	14	4		8	43		62		82	102	82		9	2		1	12
7			10	10		56			43	43		6		1	6	6		1		1	1	9		1800	600		34		28	56	7	46	28	46		89	46		64		86	106	86		1	19		2	2
24			4	4		14			7	7		10		4	2	2		39		4	5	14		1800			66		6	27	1	97	6	97		13	40		43		86	62	29		1	3		1	9
2			8	8		2			58	58		1			19	19		3		1	6	12		3300			62		11	87	1	8	11	11		22	13		89		2	64	86		2	1		1	31
5			2	2		96			42	42		13			10	10		1		1	4	7		3600			88		83	56	5	55	83	55		62	61		24		3	43	2		1	10		4	19
7			6	6		41			35	35		1			9	9		57		18	2	3		8400			73		48	66	9	38	48	53		10	54		40		28	89	3		2	2		4	14
10			3	3		56			52	52		3			5	7		9		1	8	2		1200			54		72	49	2	82	72	82		61	44		44		60	24	29		17	20		3	45
8			4	4		88			58	58		1			2	2		13		14	5	9		1500			22		39	38		64	39	64		52	22		112		19	40	60		1	66		2	5
6						54			34	34		1			1	1		34		4	2	7		1500			23		21	24		2	21	23		74	46		59		63	44	19		1	54		2	1
4						8			61	61		2			1	1		11		3	3	4		9600			17		5	18		61	5	61		10	3		47		44	112	63		2	57		9	1
3						56			52	52		3			16	1		8		12	48	2		600			41		5	50		25	5	25		78	38				10	59	44		1	31		1	3
10						5			32	32		1			5	16		30		1	7	8		5700			30		76	53		73	76	73		47	65				94	47	10		1	15		1
8						29			38	38		2			2	5		3		2	2	6		1200			39		37	25		60	37	60		53	112				64		94		51	5		1
4						7			48	48		1			7	2		17		1	1	2		1500			21		14	87		2	14	2		13	12				43		65		57	5		3
						44			15	15		1			19	1		20		2	6	21		300			53		97	61		3	97	3		47	87				15		43		41	63		24
						15			44	44		12			2	7		38		15	1	48		8400			13		14	37		30	14	30		6	51				24		17		6	19		8
						57			86	86		29			3	20		39		3	7	7		3300			61		70	37		55	70	55		28	8				80		24		10	18		3
						47			25	25		4			1	2		64		7	1	3		600			29		1	19		5	1	6		14	22				73		80		16	56		2
						45			37	37		1			1	3		7		12	5	15		1200			8		85	27		29	85	29		44	81				68		73		62	21		7
						11			42	42		2			1	1		4		13	2	6		2400			26		6	25		9	6	10		26	8				26		68		2	20		1
						36			31	31		16			3	1		63		17	13	1					81		8	110		97	8	97		109	67				58		28		26	16		2
						57			57	57		1			8	1		43		2	2	7					70		63	63		32	63	32		43	7				28		58		7	27		3
						17			66	66		13			1	3		8		13	2	4					30		106	36		102	106	102			3				73		28		65	6		2
						59			128	128		12			2	8		1		7	1	1					55		37	55		3	37	6			71				63		73		42	1		1
						15			99	99		2			5	2		2		4	2	8					52		11	64		46	11	46			14				32		63		31	60
						61			11	11		12			5	2		78		5	7	14					83		89	42		64	89	65			14				56		32		16	57
						62			36	36		6			4	5		15		13	4	14					10		23	35		1	23	8			18				25		56		58	1
						45			97	97		5			2	5		5		9	3	2					28		66	42		66	66	66			30				28		25		21	36
						2			31	31		33			1	4		56		18	4	4					70		2	38		1	2	1			58				32		28		29	73
						42			42	42		35			1	2		11		5	4	2					26			96		20		20			71				103		32		45	2
						72			76	76		11			4	1		16		21	5	4					45			54		57		57			33				86		103		27	47
						19			4	4		6			2	1		64		1	6	22					23			24		73		74			21				78		86		1	1
						88			17	17		2			1	4		12			2	7					21			89		32		32							89		78		1	1
						79			92	92		7			5	3		4			8	10					48			61		73		73							83		89		1	1
						59			133	133		6			2	2		11			2	16					74			21		31		31							20		83		1
						102			58	58		38			2	2		7			4	17					80			12		64		64							40		20		1
						21						3			5	5		86			1	22					61			47		38		38							56		40
						63						1			2	2		8			1	2					48			47		16		16							90		56
						54						2			2	2		35			3	19					11			79		82		82							52		90
												2			2	7		58			1	2					25			98		42		43							49		52
												1			2	6		64			1	8					22			52		16		21							47		49
												18			1	9		69			1	7					69			43		43		43									47
												31			3	1		40				6					53			59		3		3
												1				1		34				4					53			102		74		83
												2				2		61				1					58			79		88		88
												22				2		16				5					22			22		54		54
												26				1		25				1					44			30		27		27
												4				3		32				13					86			35		37		37
												15				4		49				12					24			17		47		47
												2						28				19					40			52		60		60
												2						62				6					6			22		87		87
												9						13				22					35			43		78		78
												17						12				1					39			104		44		44
												36						22									49			56		154		154
												5						3									89			48		116		116
												26						100									104					86		88
																		44									13
																		51									21
																		19									48
																		33									18
																		66									72
																		28									42
																		24									62
																		38									59
																		19									65
																		53									18
																		35									66
																		45									99
																		69									5
																		7									17
																		92									2
																		28									54
																		17									68
																		5									1
																		21									78
																		63									21
																		50									77
																		67									13
																		58									48
																		61
																		96
																		34
																		65
																		13
																		46
																		69
																		22
																		19
																		63
																		30
																		6
																		4
																		56
																		66
																		13
																		73
																		64
																		39
																		26
																		58
																		38
																		17
																		3
																		4
																		48
																		18
																		72
																		65
																		45
																		40
																		43
[truncated: 63 more columns]
